# Supplementary material for: Laser-induced thermoelastic effects can evoke tactile sensations
Source: PubMed Central journal article supplement (PMC4603782; doi:10.1038/srep11016), 2015-06-05
Supplement: srep11016-s1.pdf [file srep11016-s1.pdf]

# Laser-induced thermoelastic effects can evoke tactile sensations

Jae-Hoon Jun<sup>1\*</sup>, Jong-Rak Park<sup>2\*</sup>, Sung-Phil Kim<sup>3\*</sup>, Young Min Bae<sup>4\*</sup>, Jang-Yeon Park<sup>5,6\*</sup>,  
Hyung-Sik Kim<sup>1\*</sup>, Seungmoon Choi<sup>7</sup>, Sung Jun Jung<sup>8</sup>, Seung Hwa Park<sup>9</sup>, Dong-Il Yeom<sup>10</sup>,  
Gu-In Jung<sup>1</sup>, Ji-Sun Kim<sup>1</sup> & Soon-Cheol Chung<sup>1†</sup>

<sup>1</sup>Department of Biomedical Engineering, BK21+ Research Institute of Biomedical Engineering, College of Biomedical & Health Science, Konkuk University, Chungju, Chungbuk 380-701, South Korea

<sup>2</sup>Department of Photonic Engineering, Chosun University, Gwangju 501-759, South Korea

<sup>3</sup>Department of Human and Systems Engineering, Ulsan National Institute of Science and Technology, Ulsan 689-798, South Korea

<sup>4</sup>Department of Physiology, KU Open Innovation Center, Research Institute of Medical Science, Konkuk University School of Medicine, Chungju, Chungbuk 380-701, South Korea

<sup>5</sup>Center for Neuroscience Imaging Research (CNIR), Institute for Basic Science (IBS), Suwon, Gyeonggi 440-746, South Korea

<sup>6</sup>Department of Biomedical Engineering, Sungkyunkwan University, Suwon, Gyeonggi 440-746, South Korea

<sup>7</sup>Department of Computer Science and Engineering, Pohang University of Science and Technology, Pohang, Gyeongbuk 790-784, South Korea

<sup>8</sup>Department of Physiology, Medical School, Hanyang University, Seoul 133-791, South Korea

<sup>9</sup>Department of Anatomy, Konkuk University School of Medicine, Chungju, Chungbuk 380-701, South Korea

<sup>10</sup>Department of Physics and Energy Systems Research, Ajou University, Suwon, Gyeonggi 443-749, South Korea

\*These authors contributed equally to this work.

†Correspondence to Soon-Cheol Chung (e-mail to [scchung@kku.ac.kr](mailto:scchung@kku.ac.kr))

# CON

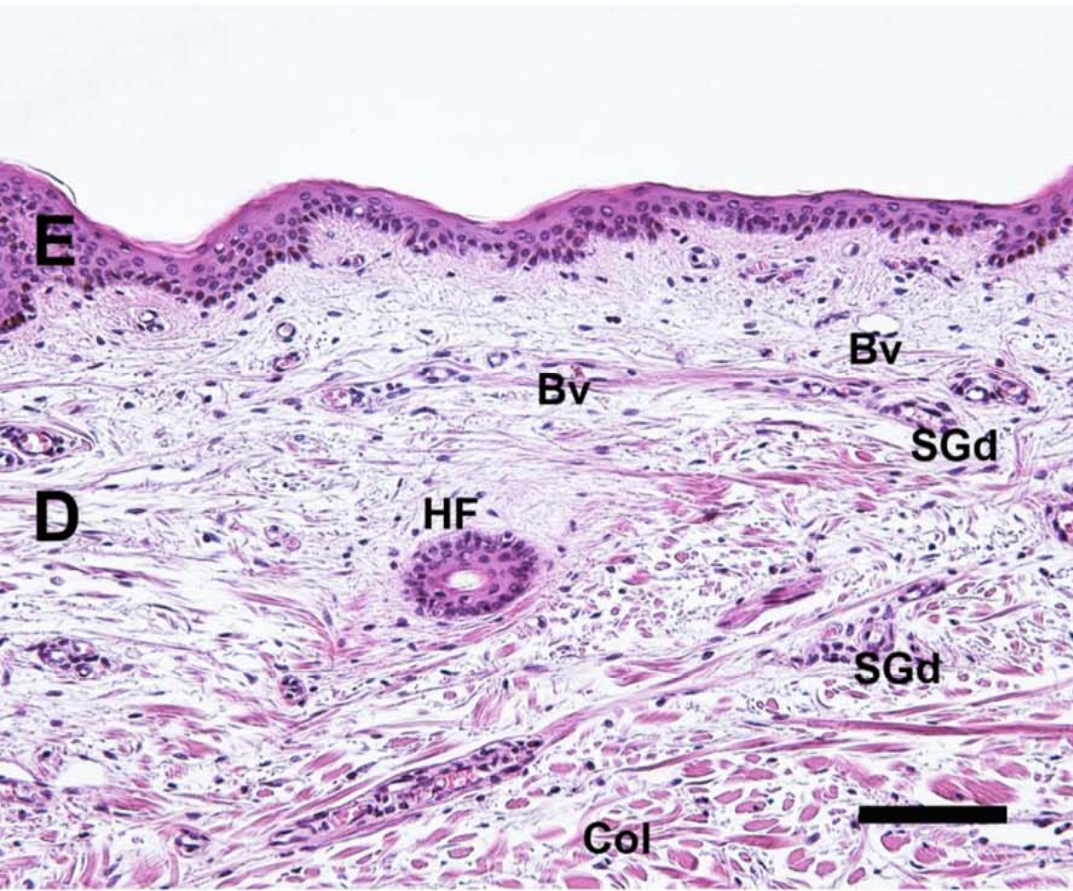

E : epidermis , D : dermis

HF : hair follicle, Bv : blood vessel

SGd : ducts of sweat gland

Col : bundles of collagen fibers

Scale bar : 100  $\mu$ m

# Laser irradiation

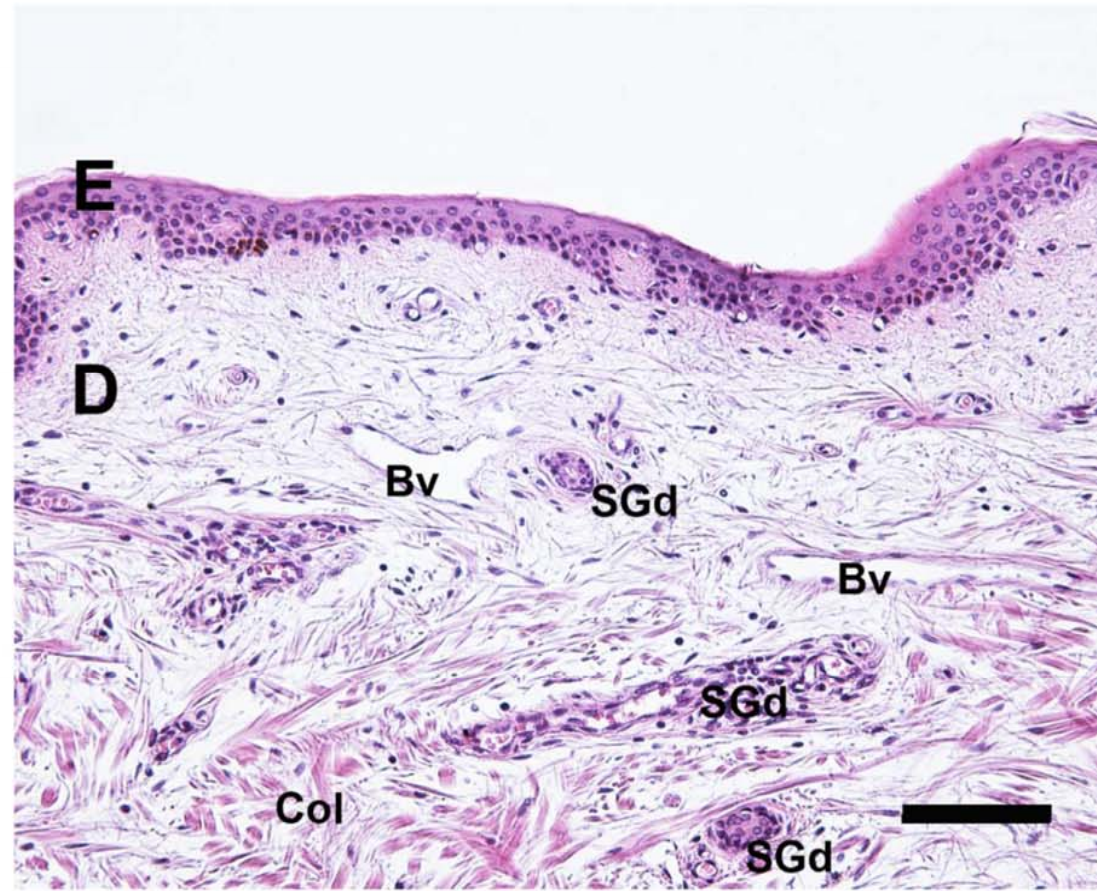

E : epidermis , D : dermis

Bv : blood vessel

SGd : ducts of sweat gland

Col : bundles of collagen fibers

Scale bar : 100  $\mu$ m

**Supplementary Figure 1.** Examples of histological sections of control (left) and laser-irradiated (right) human cadaver skins. The results indicate that the laser-irradiation did not damage the skin. For histological examination, control and the laser-irradiated skins were treated in routine procedures of the histological examination and were embedded in paraffins. Paraffin-embedded specimens were sectioned at a thickness of 5  $\mu\text{m}$  and were stained by the hematoxylin and eosin (H & E) staining method. All of the stained sections were photographed using a 2048x1536-pixel digital CCD camera (DP70, Olympus, Tokyo, Japan).
